# Supplementary material
Source: PubMed Central journal article supplement (PMC7489368)

## Supplementary Online Content

Tolaney SM, Barroso-Sousa R, Keenan T, et al. Effect of eribulin with or without pembrolizumab on progression-free survival for patients with hormone receptor–positive, *ERBB2*-negative metastatic breast cancer: a randomized clinical trial. *JAMA Oncol*. Published online September 3, 2020. doi:10.1001/jamaoncol.2020.3524

**eTable 1.** Patient characteristics at baseline, continued.

**eTable 2.** Most common adverse events\* during the study.

**eTable 3.** Adverse events suggestive of potential immune-related etiology.

**eFigure 1.** Tumor genomic alterations ordered by progression-free survival (PFS).

**eFigure 2.** Forest-plot analyses of progression-free survival (PFS) in key subgroups.

**eFigure 3.** Kaplan–Meier analysis of progression-free survival (PFS) in patients of Arm B who received pembrolizumab following progression to eribulin.

This supplementary material has been provided by the authors to give readers additional information about their work.

**eTable 1. Patient characteristics at baseline, continued.**

| <b>Characteristic</b>                 | <b>Eribulin + Pembrolizumab<br/>(N=44)</b> | <b>Eribulin<br/>(N=44)</b> |
|---------------------------------------|--------------------------------------------|----------------------------|
| <b>PD-L1</b>                          |                                            |                            |
| Positive                              | 13 (29.5%)                                 | 11 (25.0%)                 |
| Negative                              | 21 (47.7%)                                 | 20 (45.4%)                 |
| Unknown                               | 10 (22.7%)                                 | 13 (29.5%)                 |
| <b>Tumor-infiltrating lymphocytes</b> |                                            |                            |
| Median (range)                        | 5 (<5-30)                                  | 5 (<5-30)                  |
| 0-10%                                 | 25 (57)                                    | 22 (50)                    |
| >10%                                  | 6 (14)                                     | 5 (11)                     |
| Unknown                               | 13 (29)                                    | 17 (39)                    |
| <b>Tumor Mutational Burden (TMB)</b>  |                                            |                            |
| Median (range)                        | 7.0 (2.4-21.3)                             | 5.3 (1.5-14.5)             |
| TMB $\leq$ 6                          | 11 (25.0%)                                 | 13 (29.5%)                 |
| 6<TMB<10                              | 12 (27.3%)                                 | 9 (20.5%)                  |
| TMB $\geq$ 10                         | 5 (11.4%)                                  | 2 (4.5%)                   |
| Unknown                               | 16 (36.4%)                                 | 20 (45.4%)                 |

**eTable 2. Most common adverse events\* during the study.**

| Adverse Event           | Eribulin + pembrolizumab<br>(n=44) |           | Eribulin<br>(n=44) |           |
|-------------------------|------------------------------------|-----------|--------------------|-----------|
|                         | All Grades                         | Grade 3-4 | All Grades         | Grade 3-4 |
| Any event               | 44 (100%)                          | 30 (68%)  | 44 (100%)          | 27 (61%)  |
| Fatigue                 | 36 (82%)                           | 2 (5%)    | 31 (70%)           | 3 (7%)    |
| Alopecia                | 24 (55%)                           | 0 (0%)    | 18 (41%)           | 0 (0%)    |
| Neuropathy (peripheral) | 23 (52%)                           | 4 (9%)    | 24 (55%)           | 3 (7%)    |
| Nausea                  | 22 (50%)                           | 1 (2%)    | 24 (55%)           | 0 (0%)    |
| Neutropenia             | 21 (48%)                           | 16 (36%)  | 29 (66%)           | 16 (36%)  |
| AST elevation           | 17 (39%)                           | 6 (14%)   | 12 (27%)           | 2 (5%)    |
| Diarrhea                | 16 (36%)                           | 0 (0%)    | 9 (21%)            | 0 (0%)    |
| Dyspnea                 | 13 (30%)                           | 2 (5%)    | 3 (7%)             | 0 (0%)    |
| ALT elevation           | 13 (30%)                           | 1 (2%)    | 9(20%)             | 3 (7%)    |
| Anorexia                | 13 (30%)                           | 0 (0%)    | 13 (30%)           | 0 (0%)    |
| Anemia                  | 11 (25%)                           | 1 (2%)    | 12 (27%)           | 2 (5%)    |
| Constipation            | 12 (27%)                           | 0 (0%)    | 8 (18%)            | 0 (0%)    |
| Cough                   | 11 (25%)                           | 0 (0%)    | 0 (0%)             | 0 (0%)    |
| Headache                | 10 (23%)                           | 0 (0%)    | 8 (18%)            | 0 (0%)    |
| Mucositis oral          | 10 (23%)                           | 2 (5%)    | 10 (23%)           | 3 (7%)    |
| Vomiting                | 11 (25%)                           | 1 (2%)    | 5 (12%)            | 0 (0%)    |
| Fever                   | 8 (18%)                            | 0 (0%)    | 9 (21%)            | 0 (0%)    |

**\*All relatedness**

Abbreviations: ALT, alanine transaminase; AST, aspartate aminotransferase; only includes events occurring in  $\geq 20\%$  of patients

**eTable 3. Adverse events suggestive of potential immune-related etiology.**

| Adverse Event                    | Eribulin + pembrolizumab<br>(n=44) |                |
|----------------------------------|------------------------------------|----------------|
|                                  | All Grades                         | Grade $\geq$ 3 |
| Liver enzyme/bilirubin elevation | 17 (39%)                           | 6 (14%)        |
| Rash                             | 13 (30%)                           | 0(0%)          |
| Hypothyroidism                   | 6 (14%)                            | 0 (0%)         |
| Hyperthyroidism                  | 6 (14%)                            | 0 (0%)         |
| Flu-like symptoms                | 5 (11%)                            | 0 (0%)         |
| Arthralgias                      | 5 (11%)                            | 0 (0%)         |
| Pneumonitis                      | 3 (7%)                             | 1 (2%)         |
| Myocarditis                      | 1 (2%)                             | 1 (2%)         |
| Colitis*                         | 2 (5%)                             | 2 (5%)         |

\*2 patients experienced treatment related grade 5 events; both patients experienced colitis, neutropenia and sepsis

**eFigure 1. Tumor genomic alterations ordered by progression-free survival (PFS).**

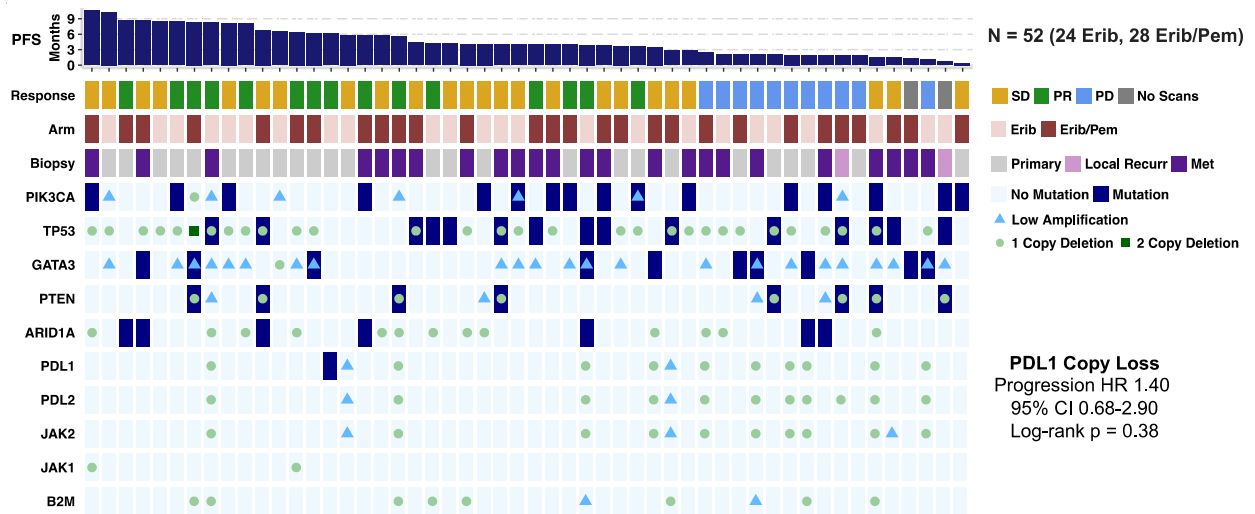

Each column represents a tumor unique to a patient. Shown are the five most commonly mutated genes in this cohort (*PIK3CA*, *TP53*, *GATA3*, *PTEN*, *ARID1A*) and five immunotherapy-related genes (*PDL1* also called *CD274*, *PDL2* also called *PDCD1LG2*, *JAK2*, *JAK1*, *B2M*).

Abbreviations: CI, confidence interval; Erib, eribulin; Erib/Pem, eribulin/pembrolizumab; HR, hazard ratio; Local Recurr, local recurrence; Met, metastasis; PD, progressive disease; PR, partial response; SD, stable disease.

eFigure 2. Forest-plot analyses of progression-free survival (PFS) in key subgroups.

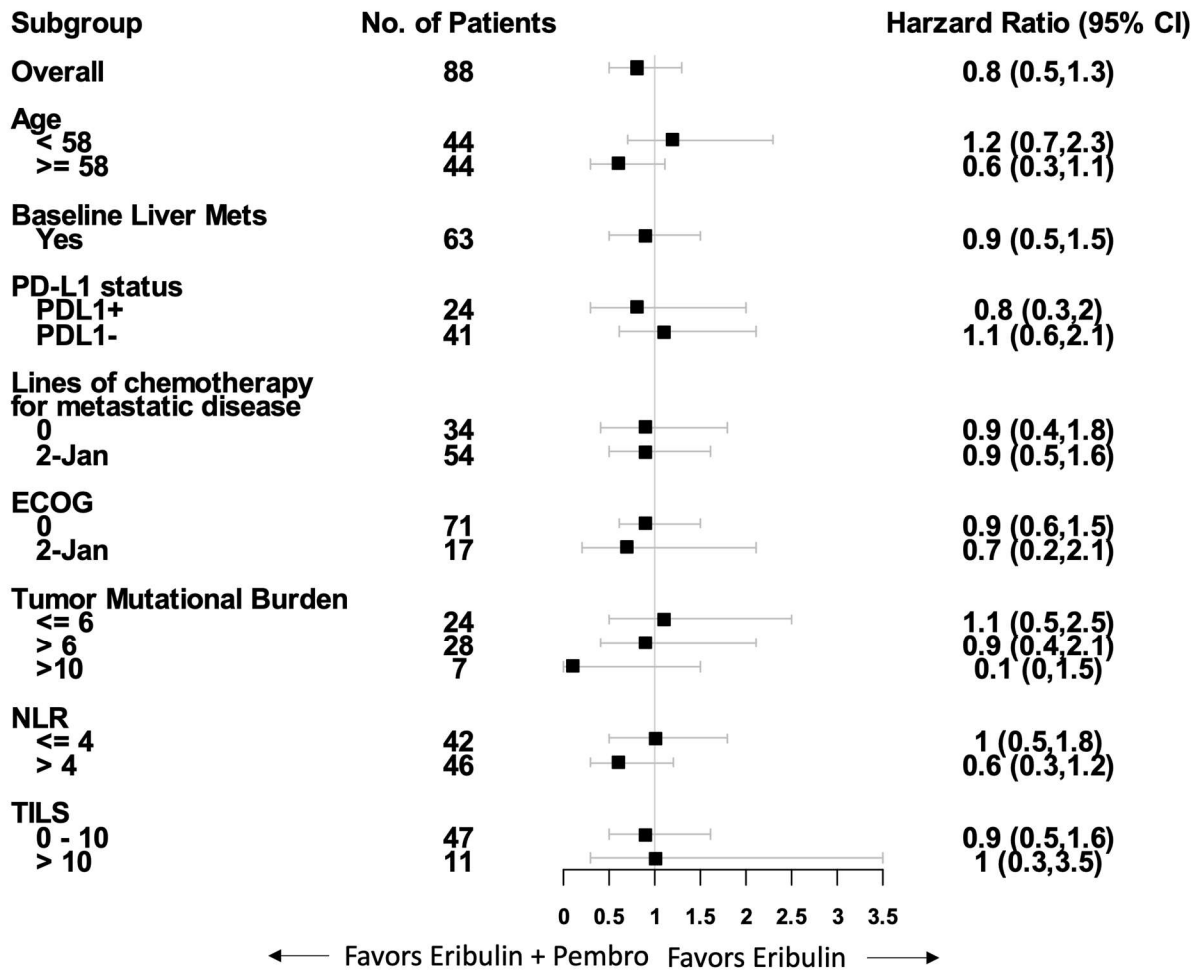

Abbreviations: Pembro: Pembrolizumab; NRL: neutrophil-lymphocyte ratio, which is defined as absolute neutrophil count divided by absolute lymphocyte count; TIL, tumor-infiltrating lymphocyte.

**eFigure 3. Kaplan–Meier analysis of progression-free survival (PFS) in patients of Arm B who received pembrolizumab following progression to eribulin.**

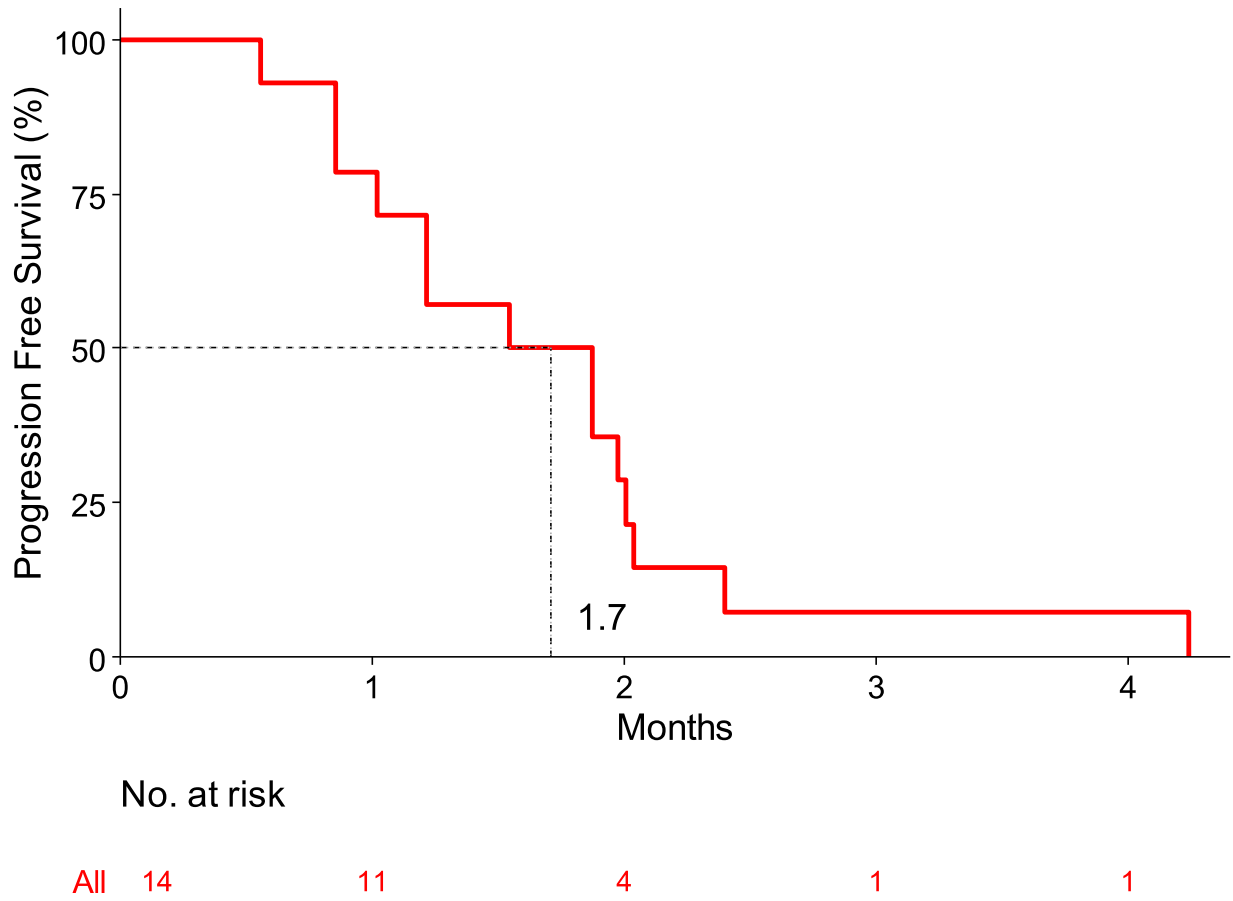

Supplement: jamaoncol-e203524-s002.pdf [file jamaoncol-e203524-s002.pdf]
