# Supplementary material
Source: PubMed Central journal article supplement (PMC7489368)
Supplement: jamaoncol-e203524-s003.pdf [file jamaoncol-e203524-s003.pdf]

## Data Sharing Statement

Tolaney. Effect of Eribulin With or Without Pembrolizumab on Progression-Free Survival for Patients With Hormone Receptor-Positive, ERBB2-Negative Metastatic Breast Cancer. *JAMA Oncol.* Published September 03, 2020. 10.1001/jamaoncol.2020.3524

### Data

**Data available:** Yes

**Data types:** Other (please specify)

**Additional Information:** The datasets used and/or analysed during the current study are available from the corresponding author on reasonable request.

**How to access data:** The datasets used and/or analysed during the current study are available from the corresponding author on reasonable request.

**When available:** With publication

### Supporting Documents

**Document types:** None

### Additional Information

**Who can access the data:** anyone requesting the data

**Types of analyses:** The datasets used and/or analysed during the current study are available from the corresponding author on reasonable request.

**Mechanisms of data availability:** The datasets used and/or analysed during the current study are available from the corresponding author on reasonable request.
